# Supplementary material
Source: PubMed Central journal article supplement (PMC6437017)
Supplement: NIHMS992619-supplement-Supplemental.pdf [file NIHMS992619-supplement-Supplemental.pdf]

## Supplemental material

Article title: Patterns of host-associated fecal indicators driven by hydrology, precipitation and land use attributes in Great Lakes watersheds

Deborah K. Dila<sup>a</sup>, Steven R. Corsi<sup>b</sup>, Peter L. Lenaker<sup>b</sup>, Austin K. Baldwin<sup>c</sup>, Melinda J. Bootsma<sup>a</sup>, Sandra L. McLellan<sup>a\*</sup>

<sup>a</sup> School of Freshwater Sciences, University of Wisconsin-Milwaukee, Milwaukee, WI 53204, USA

<sup>b</sup> U.S. Geological Survey, Wisconsin Water Science Center, Middleton, WI 53562, USA

<sup>c</sup> U.S. Geological Survey, Idaho Water Science Center, Boise, ID 83702, USA

\* Correspondence: Sandra McLellan, [mclellan@uwm.edu](mailto:mclellan@uwm.edu)

### List of contents:

**Table S1.** USGS station ID for streamgages representing each watershed.

**Table S2.** Study site location and land use for eight Great Lakes watersheds sampled during 2011-2013.

**Table S3.** Traditional host associated qPCR assay primers, standard curves, and references.

**Table S4.** Quantitative polymerase chain reaction (qPCR) data and microbial plate-counts for all sites.

**Table S5.** Spearman's rank correlation coefficients ( $\rho$ ) for HB and Lachno2 for all sites and at each site. Event and low-flow correlations are presented. p, significance level of correlation coefficients.

**Table S6.** Percent enterococci and *E. coli* over Federal water quality thresholds found at each site. FIB measured in CFU/100 mL.

**Figure S1.** Map of eight Great Lakes watersheds studied for microbiological contamination. Major land use categories and watershed boundaries (U.S. Department of Agriculture-Natural Resources Conservation Service (2009)). Collection sites (white dots) located at USGS streamgages nearest receiving waters.

**Figure S2.** Boxplots showing low-flow (light-blue), rain (dark-blue) and snowmelt (gray) event concentrations of fecal indicators. Letters above plots indicate significant differences between watersheds in mean indicator concentrations (Tukey). Y-axis is log-base10. The center line of each boxplot represents the median, the upper line represents the 75th percentile, the lower line represents the 25th percentile, the upper whisker represents the maximum, the lower whisker represents the minimum, and the dots represent sample distribution. HB = human *Bacteroides*; Lachno2 = human *Lachnospiraceae2*; ENT = enterococcus; BacR = ruminant *Bacteroides*.

**Table S1.** USGS stream gage station ID representing each watershed.

| Watershed       | USGS Station ID |
|-----------------|-----------------|
| Menominee River | 04067500        |
| Manitowoc River | 04085427        |
| Milwaukee River | 04087170        |
| Clinton River   | 04165500        |
| River Rouge     | 04166500        |
| River Raisin    | 04176500        |
| Maumee River    | 04193490        |
| Portage River   | 04195500        |

**Table S2.** Study site location and land use for eight Great Lakes watersheds sampled during 2011-2013.

| Watershed       | Low-flow Period (n)* | Rainfall Event (n) | Snowmelt Event (n) | Population (km <sup>2</sup> ) | Cattle (km <sup>2</sup> ) | Land use percentage <sup>a</sup> |       |                   |                          |               |          |               |
|-----------------|----------------------|--------------------|--------------------|-------------------------------|---------------------------|----------------------------------|-------|-------------------|--------------------------|---------------|----------|---------------|
|                 |                      |                    |                    |                               |                           | Impervious Surface               | Urban | Agriculture: Crop | Agriculture: Pasture/Hay | Tile Drainage | Forested | Wetland/Water |
| Rouge River     | 12                   | 11                 | 7                  | 6,470                         | 8                         | 33.1                             | 92.0  | 0.0               | 0.1                      | 1.5           | 4.5      | 3.1           |
| Clinton River   | 12                   | 14                 | 7                  | 4,097                         | 3                         | 20.0                             | 52.8  | 11.9              | 7.6                      | 3.0           | 14.5     | 11.2          |
| Milwaukee River | 11                   | 8                  | 5                  | 2,909                         | 57                        | 11.3                             | 29.9  | 27.5              | 15.7                     | 10.0          | 12.0     | 13.2          |
| Raisin River    | 12                   | 10                 | 2                  | 396                           | 13                        | 2.4                              | 11.1  | 49.3              | 18.0                     | 37.0          | 10.8     | 9.6           |
| Maumee River    | 12                   | 12                 | 6                  | 363                           | 12                        | 2.3                              | 10.6  | 73.3              | 5.5                      | 71.0          | 6.4      | 3             |
| Portage River   | 10                   | 11                 | 6                  | 38                            | 7                         | 2.0                              | 9.8   | 83.6              | 0.6                      | 80.0          | 4.5      | 0.7           |
| Manitowoc River | 10                   | 13                 | 4                  | 164                           | 143                       | 1.5                              | 7.0   | 38.1              | 31.8                     | 10.0          | 6.2      | 15.5          |
| Menominee River | 10                   | 10                 | 4                  | 38                            | 4                         | 0.4                              | 3.8   | 2.3               | 1.4                      | 4.0           | 54.8     | 33.1          |

<sup>a</sup> land use percentages do not add up to 100 as some functions overlap and others are not included

n = number of events for each watershed

km<sup>2</sup> = per km<sup>2</sup>

**Table S3.** Traditional host associated qPCR assay primers, standard curves, and references.

| Assay, target, and reference                                                                                                               | Primers                             | Sequence                                                                                                                           | Slope and y intercept | Efficiency |
|--------------------------------------------------------------------------------------------------------------------------------------------|-------------------------------------|------------------------------------------------------------------------------------------------------------------------------------|-----------------------|------------|
| enterococci<br>23S rRNA gene<br>USEPA 2012                                                                                                 | Entero1F-G<br>Entero2R<br>Enterop   | 5'GAG AAA TTC CAA ACG AAC TTG3'<br>5'CAG TGC TCT ACC TCC ATC ATT3'<br>5'[6FAM]-TGGTTCTCTCCGAAATAGCTTTAGGGCTA[<br>MGB-NFQ] 3'       | -3.37, 39.55          | 98.13      |
| HB<br>16S rRNA gene of Human<br><i>Bacteroides</i><br>Templar et al. 2016, modified<br>from Bernhard and Field 2000<br>Kildare et al. 2007 | HF183F<br>HF241R<br>HF193p          | 5'ATC ATG AGT TCA CAT GTC CG3'<br>5'CGT TAC CCC GCC TAC TAT CTA ATG3'<br>5'[6FAM]-TCC GGT AGA CGA TGG GGA TGC GTT [MGB-<br>NFQ] 3' | -3.30, 37.72          | 100.85     |
| Lachno2<br>Human <i>Lachnospiraceae</i><br>(genus <i>Blautia</i> )<br>Newton et al. 2011                                                   | Lachno2-F<br>Lachno2-R<br>Lachno2p  | 5'TTCGCAAGAATGAAACTCAAAG3'<br>5'AAGGAAAGATCCGGTTAAGGATC3'<br>5'[6FAM]-ACCAAGTCTTGACATCCG [MGB-NFQ] 3'                              | -3.38, 37.37          | 97.76      |
| BacR<br>Ruminant-Specific <i>Bacteroidetes</i><br>Reischer et al. 2006                                                                     | RumBacR_f<br>RumBacR_r<br>RumBacR_p | 5'GCG TAT CCA ACC TTC CCG3'<br>5'CAT CCC CAT CCG TTAC CG3'<br>5'[6FAM]-CTT CCG AAA GGG AGA TT [MGB-NFQ]3'                          | -3.51, 40.97          | 92.82      |

### References for Table S3

- Bernhard, A. E. and Katharine G. Field, 2000b. A PCR Assay to Discriminate Human and Ruminant Feces on the Basis of Host Differences in *Bacteroides-Prevotella* Genes Encoding 16S rRNA. *Appl Environ Microb* 66: 4571-4574.
- Kildare, Beverly J., Christian M. Leutenegger, Belinda S. McSwain, Dustin G. Bambic, Veronica B. Rajal, Stefan Wuertz,. 2007. 16S rRNA-based Assays for Quantitative Detection of Universal, Human-, Cow-, and Dog-specific Fecal *Bacteroidales*: A Bayesian Approach. *Water Res* 41: 3701-3715.
- Newton, Ryan, Vandewalle, Jessica L, Borchardt, Mark A, Gorelick, Marc H and McLellan, Sandra L, 2011. *Lachnospiraceae* and *Bacteroidales* Alternative Fecal Indicators Reveal Chronic Human Sewage Contamination in an Urban Harbor. *Appl Environ Microbiol* 77: 6972-6981.
- Reischer, G., D.C. Kasper, R. Steinborn, R.L. Mach, and A.H. Farnleitner. 2006. Quantitative PCR Method for Sensitive Detection of Ruminant Pollution in Freshwater and Evaluation of This Method in Alpine Karstic Regions. *Appl Environ Microb* 72, 8: 5610-5614
- Templar, H. A., Dila, D. K., Bootsma, M. J., Corsi, S. R. & McLellan, S. L. (2016). Quantification of human-associated fecal indicators reveal sewage from urban watersheds as a source of pollution to Lake Michigan. *Water Res* **100**, 556-567.
- USEPA. 2012. Method 1611: Enterococci in Water by TaqMan® Quantitative Polymerase Chain Reaction (qPCR) Assay. Office of Water, Washington, DC. EPA-821-R-12-008.

**Table S4.** Quantitative polymerase chain reaction (qPCR) data and microbial plate-counts for all sites. Abbreviation FT is the McLellan Lab data tracking system.

| FT    | Site      | DATE     | Hydrology | qPCR Assays (CN/100 mL) |        |        |        | Plate-counts (CFU/100 mL) |       |
|-------|-----------|----------|-----------|-------------------------|--------|--------|--------|---------------------------|-------|
|       |           |          |           | HB                      | LAC    | ENT    | RUM    | Entero                    | Ecoli |
| 11096 | Milwaukee | 7/19/11  | Low-flow  | 891                     | 1067   | 585    | 0      | 2                         | 21    |
| 11266 | Menominee | 7/28/11  | Low-flow  | 225                     | 0      | 665    | 0      | 0                         | 12    |
| 11268 | Manitowoc | 7/28/11  | Low-flow  | 225                     | 0      | 10887  | 1035   | 17                        | 44    |
| 11322 | Clinton   | 8/3/11   | Event     | 28913                   | 63677  | 32694  | 315    | 1860                      | 2530  |
| 11353 | Portage   | 8/10/11  | Event     | 2396                    | 3509   | 10199  | 2017   | NA                        | NA    |
| 11354 | Maumee    | 8/11/11  | Event     | 0                       | 0      | 0      | 0      | 320                       | 430   |
| 11368 | Clinton   | 8/12/11  | Event     | 2961                    | 2522   | 43159  | 300    | 2500                      | 2700  |
| 11369 | Rouge     | 8/12/11  | Event     | 105695                  | 254227 | 102734 | 2507   | 5000                      | 3400  |
| 11453 | Portage   | 8/24/11  | Low-flow  | 10170                   | 9353   | 27062  | 360    | 120                       | 270   |
| 11454 | Maumee    | 8/24/11  | Low-flow  | 225                     | 0      | 3076   | 0      | 50                        | 500   |
| 11467 | Rouge     | 8/25/11  | Low-flow  | 7676                    | 10822  | 18317  | 0      | 500                       | 1400  |
| 11468 | Raisin    | 8/25/11  | Low-flow  | 664                     | 225    | 12816  | 0      | 1300                      | 100   |
| 11469 | Clinton   | 8/25/11  | Low-flow  | 376                     | 288    | 2463   | 0      | 400                       | 1100  |
| 11482 | Maumee    | 8/30/11  | Event     | 225                     | 0      | 5200   | 360    | 280                       | 300   |
| 11483 | Portage   | 8/30/11  | Event     | 978                     | 3283   | 3161   | 2091   | 940                       | 880   |
| 11489 | Rouge     | 8/31/11  | Event     | 7162                    | 59490  | 9659   | 0      | 170                       | 560   |
| 11523 | Manitowoc | 9/1/11   | Low-flow  | 225                     | 0      | 7159   | 1060   | 46                        | 43    |
| 11526 | Menominee | 9/1/11   | Low-flow  | 0                       | 0      | 824    | 0      | 8                         | 6     |
| 11528 | Manitowoc | 9/9/11   | Event     | 225                     | 0      | 10279  | 903    | 10                        | 60    |
| 11529 | Raisin    | 9/13/11  | Event     | 225                     | 341    | 7507   | 285    | 350                       | 160   |
| 11530 | Clinton   | 9/13/11  | Event     | 6633                    | 15731  | 20720  | 0      | 610                       | 1480  |
| 11531 | Rouge     | 9/13/11  | Event     | 19015                   | 134307 | 38903  | 315    | 1360                      | 3280  |
| 11532 | Portage   | 9/13/11  | Event     | 2460                    | 17864  | 9010   | 16504  | 1040                      | 1490  |
| 11533 | Maumee    | 9/13/11  | Event     | 1910                    | 566    | 7569   | 1574   | 1060                      | 450   |
| 11574 | Milwaukee | 9/22/11  | Event     | 294                     | 494    | 1164   | 0      | 16                        | 13    |
| 11640 | Manitowoc | 10/6/11  | Event     | 225                     | 0      | 2880   | 4701   | 7                         | 53    |
| 11649 | Rouge     | 10/13/11 | Low-flow  | 2303                    | 8212   | 1298   | 0      | 78                        | 77    |
| 11650 | Raisin    | 10/13/11 | Low-flow  | 225                     | 196    | 1268   | 0      | 56                        | 30    |
| 11652 | Clinton   | 10/13/11 | Low-flow  | 887                     | 732    | 2261   | 0      | 53                        | 88    |
| 11654 | Portage   | 10/13/11 | Low-flow  | 9301                    | 23826  | 10241  | 0      | 44                        | 104   |
| 11655 | Milwaukee | 10/13/11 | Low-flow  | 173                     | 111    | 597    | 0      | 5                         | 9     |
| 11697 | Menominee | 10/19/11 | Event     | 225                     | 155    | 1125   | 128    | 38                        | 65    |
| 11699 | Milwaukee | 10/19/11 | Event     | 1467                    | 790    | 3421   | 128    | 8                         | 60    |
| 11728 | Clinton   | 10/26/11 | Event     | 677173                  | 868564 | 83584  | 3145   | 4200                      | 3900  |
| 11729 | Rouge     | 10/26/11 | Event     | 7088                    | 69031  | 23710  | 0      | 710                       | 1010  |
| 11730 | Raisin    | 10/26/11 | Event     | 877                     | 1084   | 4454   | 13276  | 630                       | 260   |
| 11765 | Menominee | 11/5/11  | Low-flow  | 225                     | 225    | 946    | 0      | 12                        | 6     |
| 11768 | Maumee    | 11/9/11  | Low-flow  | 2844                    | 3573   | 8175   | 330    | 113                       | 133   |
| 11769 | Manitowoc | 11/9/11  | Event     | 225                     | 0      | 2896   | 1571   | 3                         | 8     |
| 11778 | Menominee | 11/16/11 | Event     | 903                     | 525    | 867    | 649    | 18                        | 7     |
| 11779 | Manitowoc | 11/16/11 | Event     | 225                     | 628    | 28097  | 67859  | 70                        | 53    |
| 11782 | Raisin    | 11/12/11 | Event     | 234                     | 793    | 4875   | 2557   | NA                        | NA    |
| 11826 | Clinton   | 12/16/11 | Low-flow  | 16330                   | 17197  | 7633   | 0      | 60                        | 560   |
| 11828 | Rouge     | 12/16/11 | Low-flow  | 25533                   | 15067  | 8048   | 0      | 74                        | 103   |
| 11830 | Raisin    | 12/16/11 | Low-flow  | 38777                   | 33672  | 6230   | 5387   | 49                        | 212   |
| 11832 | Clinton   | 12/20/11 | Event     | 14917                   | 9746   | 39185  | 30397  | 580                       | 280   |
| 11833 | Rouge     | 12/20/11 | Event     | 16567                   | 21214  | 17813  | 0      | 220                       | 220   |
| 11845 | Milwaukee | 12/29/11 | Low-flow  | 762                     | 643    | 1226   | 0      | 3                         | 28    |
| 11869 | Maumee    | 1/11/12  | Low-flow  | 19836                   | 9783   | 9392   | 11208  | 17                        | 59    |
| 11898 | Menominee | 1/13/12  | Low-flow  | 1852                    | 671    | 736    | 0      | 0                         | 0     |
| 11899 | Portage   | 1/18/12  | Event     | 97422                   | 101252 | 104904 | 261756 | 900                       | 1440  |
| 11900 | Maumee    | 1/18/12  | Event     | 98314                   | 108655 | 219716 | 245638 | 650                       | 820   |
| 11901 | Milwaukee | 1/26/12  | Event     | 31701                   | 26089  | 25455  | 0      | 22                        | 12    |
| 11905 | Raisin    | 2/14/12  | Low-flow  | 6278                    | 3581   | 33166  | 1293   | 0                         | 81    |
| 11910 | Maumee    | 2/15/12  | Low-flow  | 24686                   | 12546  | 16564  | 10608  | 0                         | 14    |
| 11911 | Portage   | 2/16/12  | Low-flow  | 26382                   | 7775   | 16942  | 0      | 8                         | 19    |
| 11914 | Rouge     | 2/17/12  | Low-flow  | 34051                   | 14132  | 17618  | 0      | 0                         | 6     |
| 11915 | Clinton   | 2/17/12  | Low-flow  | 49729                   | 17059  | 10129  | 0      | 3                         | 19    |
| 11920 | Maumee    | 2/29/12  | Event     | 24443                   | 35137  | 26735  | 22427  | 10                        | 210   |
| 11921 | Portage   | 2/29/12  | Event     | 141198                  | 117847 | 101453 | 105135 | 40                        | 810   |
| 11924 | Rouge     | 3/7/12   | Event     | 277874                  | 334596 | 43356  | 0      | 940                       | 1030  |
| 11925 | Manitowoc | 3/7/12   | Event     | 1838                    | 2345   | 30707  | 184194 | 0                         | 22    |
| 11928 | Milwaukee | 3/15/12  | Event     | 968                     | 1363   | 3426   | 2566   | 0                         | 9     |
| 11929 | Maumee    | 3/21/12  | Event     | 1477                    | 1847   | 1693   | 1582   | 55                        | 22    |
| 11930 | Portage   | 3/21/12  | Event     | 22806                   | 33052  | 13276  | 14857  | 142                       | 650   |
| 11932 | Milwaukee | 3/23/12  | Low-flow  | 282                     | 419    | 803    | 0      | 3                         | 0     |
| 11936 | Milwaukee | 4/6/12   | Event     | 1353                    | 1152   | 1413   | 0      | 8                         | 9     |
| 11971 | Maumee    | 4/20/12  | Low-flow  | 225                     | 498    | 1127   | 0      | 24                        | 28    |
| 11972 | Portage   | 4/20/12  | Low-flow  | 9645                    | 4661   | 15947  | 0      | 32                        | 27    |
| 11975 | Clinton   | 4/20/12  | Event     | 2552                    | 13605  | 20454  | 0      | 140                       | 245   |
| 11976 | Rouge     | 4/20/12  | Event     | 68355                   | 387168 | 93389  | 0      | 660                       | 1120  |
| 11984 | Clinton   | 4/25/12  | Low-flow  | 2573                    | 1628   | 2504   | 480    | 16                        | 41    |
| 11985 | Raisin    | 4/25/12  | Low-flow  | 329                     | 554    | 2246   | 465    | 14                        | 137   |
| 11986 | Rouge     | 4/25/12  | Low-flow  | 2323                    | 1363   | 1870   | 0      | 85                        | 58    |
| 11991 | Menominee | 4/27/12  | Event     | 225                     | 225    | 301    | 255    | 0                         | 0     |

| FT           | Site      | DATE     | Hydrology | qPCR Assays (CN/100 mL) |        |        |        | Plate-counts (CFU/100 mL) |       |
|--------------|-----------|----------|-----------|-------------------------|--------|--------|--------|---------------------------|-------|
|              |           |          |           | HB                      | LAC    | ENT    | RUM    | Enteroc                   | Ecoli |
| 11998        | Clinton   | 5/4/12   | Event     | 21388                   | 23341  | 22608  | 0      | 390                       | 600   |
| 11999        | Rouge     | 5/4/12   | Event     | 281044                  | 310014 | 39917  | 0      | 750                       | 1300  |
| 12000        | Menominee | 5/4/12   | Low-flow  | 904                     | 225    | 1144   | 480    | 6                         | 5     |
| 12001        | Manitowoc | 5/4/12   | Low-flow  | 225                     | 225    | 6297   | 480    | 9                         | 28    |
| 12014        | Manitowoc | 5/9/12   | Event     | 544                     | 1784   | 14064  | 164822 | 1190                      | 2190  |
| 12023        | Clinton   | 5/11/12  | Event     | 3382                    | 4446   | 11688  | 694    | 370                       | 530   |
| 12024        | Rouge     | 5/11/12  | Event     | 28489                   | 95526  | 23704  | 255    | 350                       | 1250  |
| 12025        | Portage   | 5/14/12  | Event     | 225                     | 952    | 225    | 435    | 158                       | 320   |
| 12045        | Maumee    | 5/15/12  | Event     | 225                     | 232    | 898    | 0      | 30                        | 29    |
| 12046        | Raisin    | 5/15/12  | Event     | 225                     | 223    | 882    | 0      | 17                        | 43    |
| 12047        | Menominee | 5/16/12  | Event     | 225                     | 225    | 0      | 0      | 0                         | 0     |
| 12048        | Manitowoc | 5/16/12  | Event     | 0                       | 336    | 996    | 1005   | 0                         | 16    |
| 12049        | Milwaukee | 5/25/12  | Low-flow  | 225                     | 225    | 293    | 0      | 0                         | 8     |
| 12067        | Menominee | 6/6/12   | Event     | 225                     | 244    | 1480   | 480    | 54                        | 37    |
| 12068        | Portage   | 6/7/12   | Event     | 2666                    | 2729   | 5669   | 465    | 710                       | 1120  |
| 12069        | Maumee    | 6/7/12   | Event     | 225                     | 0      | 669    | 0      | 22                        | 23    |
| 12139        | Portage   | 6/15/12  | Low-flow  | 17732                   | 3387   | 5853   | 0      | 76                        | 118   |
| 12140        | Rouge     | 6/15/12  | Low-flow  | 218                     | 402    | 1967   | 0      | 79                        | 115   |
| 12187        | Clinton   | 6/20/12  | Event     | 272                     | 675    | 2320   | 0      | 480                       | 700   |
| 12202        | Portage   | 6/22/12  | Event     | 1388                    | 4612   | 10296  | 24404  | 1560                      | 1520  |
| 12203        | Raisin    | 6/26/12  | Event     | 0                       | 0      | 3235   | 0      | 190                       | 70    |
| 12258        | Raisin    | 6/29/12  | Low-flow  | 225                     | 0      | 3565   | 0      | 460                       | 188   |
| 12259        | Clinton   | 6/29/12  | Low-flow  | 7831                    | 9217   | 1635   | 0      | 57                        | 550   |
| 12340        | Manitowoc | 7/11/12  | Low-flow  | 225                     | 0      | 6311   | 580    | 71                        | 77    |
| 12341        | Milwaukee | 7/11/12  | Low-flow  | 225                     | 225    | 0      | 0      | 0                         | 6     |
| 12344        | Maumee    | 7/12/12  | Low-flow  | 225                     | 0      | 754    | 0      | 86                        | 18    |
| 12414        | Rouge     | 7/24/12  | Event     | 225                     | 1052   | 2875   | 0      | 690                       | 1760  |
| 12416        | Clinton   | 7/24/12  | Event     | 1627                    | 4749   | 13384  | 0      | 1680                      | NA    |
| 12455        | Maumee    | 7/25/12  | Low-flow  | 225                     | 0      | 1766   | 0      | 590                       | 560   |
| 12514        | Manitowoc | 7/26/12  | Event     | 225                     | 0      | 2877   | 3248   | 84                        | 180   |
| 11978; 11994 | Milwaukee | 4/21/12  | Event     | 395                     | 317    | 1925   | 452    | 12                        | 20    |
| 11979; 11993 | Manitowoc | 4/21/12  | Event     | 225                     | 225    | 3409   | 2548   | 19                        | 24    |
| 12518        | Menominee | 8/3/12   | Event     | 0                       | 0      | 284    | 0      | 13                        | 24    |
| 12520        | Manitowoc | 8/3/12   | Event     | 0                       | 225    | 8390   | 3054   | 70                        | 151   |
| 12717        | Raisin    | 8/7/12   | Low-flow  | 264                     | 0      | 22424  | 0      | 730                       | 161   |
| 12718        | Clinton   | 8/7/12   | Low-flow  | 225                     | 458    | 3127   | 0      | 118                       | 530   |
| 12720        | Rouge     | 8/7/12   | Low-flow  | 759                     | 698    | 6417   | 0      | 710                       | 330   |
| 12750        | Menominee | 8/15/12  | Low-flow  | 225                     | 225    | 1137   | 0      | 22                        | 10    |
| 12752        | Rouge     | 8/15/12  | Event     | 61702                   | 158384 | 43289  | 0      | 1530                      | 4050  |
| 12753        | Clinton   | 8/15/12  | Event     | 141372                  | 125807 | 86153  | 1668   | 7250                      | 5500  |
| 12756        | Portage   | 8/16/12  | Event     | 31090                   | 14283  | 12043  | 525    | 890                       | 1140  |
| 12758        | Maumee    | 8/16/12  | Event     | 0                       | 0      | 0      | 0      | 81                        | 56    |
| 12773        | Manitowoc | 8/17/12  | Event     | 225                     | 225    | 6906   | 3148   | 27                        | 279   |
| 12779        | Raisin    | 8/18/12  | Event     | 225                     | 225    | 7740   | 0      | 175                       | 52    |
| 12821        | Maumee    | 8/23/12  | Low-flow  | 225                     | 0      | 4833   | 0      | 9                         | 16    |
| 12823        | Portage   | 8/23/12  | Low-flow  | 275526                  | 30301  | 16121  | 0      | 8                         | 530   |
| 12854        | Portage   | 8/31/12  | Event     | 9053                    | 5543   | 13665  | 495    | 620                       | 450   |
| 12960        | Maumee    | 9/26/12  | Event     | 225                     | 0      | 4347   | 0      | 27                        | 24    |
| 12962        | Milwaukee | 9/28/12  | Low-flow  | 225                     | 0      | 765    | 0      | 0                         | 7     |
| 12963        | Manitowoc | 9/28/12  | Low-flow  | 225                     | 0      | 6385   | 980    | 19                        | 34    |
| 12972        | Clinton   | 10/4/12  | Low-flow  | 1039                    | 593    | 2241   | 0      | 95                        | 143   |
| 12974        | Raisin    | 10/4/12  | Low-flow  | 225                     | 263    | 2813   | 0      | 37                        | 48    |
| 13144        | Maumee    | 10/17/12 | Low-flow  | 225                     | 0      | 2749   | 0      | 690                       | 31    |
| 13145        | Milwaukee | 10/16/12 | Event     | 2389                    | 3474   | 22335  | 0      | 41                        | 1100  |
| 13147        | Portage   | 10/17/12 | Low-flow  | 23079                   | 19334  | 122145 | 0      | 290                       | 271   |
| 13149        | Menominee | 10/20/12 | Event     | 0                       | 0      | 556    | 0      | 15                        | 8     |
| 13199        | Milwaukee | 10/22/12 | Event     | 971                     | 945    | 1619   | 0      | 38                        | 41    |
| 13206        | Maumee    | 10/24/12 | Event     | 0                       | 0      | 746    | 0      | 15                        | 4     |
| 13207        | Raisin    | 10/25/12 | Event     | 0                       | 0      | 225    | 0      | 5                         | 15    |
| 13208        | Rouge     | 10/25/12 | Event     | 7901                    | 3924   | 3885   | 0      | 580                       | 450   |
| 13209        | Clinton   | 10/25/12 | Event     | 4399                    | 2867   | 8332   | 0      | 380                       | 330   |
| 13245        | Rouge     | 10/29/12 | Low-flow  | 1519                    | 1041   | 2827   | 0      | 111                       | 87    |
| 13252        | Portage   | 11/5/12  | Event     | 21616                   | 9962   | 26327  | 845    | 370                       | 169   |
| 13253        | Manitowoc | 11/7/12  | Low-flow  | 236                     | 506    | 1180   | 0      | 13                        | 10    |
| 13255        | Menominee | 11/6/12  | Low-flow  | 225                     | 225    | 288    | 0      | 0                         | 8     |
| 13257        | Clinton   | 11/8/12  | Low-flow  | 4172                    | 506    | 3635   | 0      | 57                        | 66    |
| 13282        | Raisin    | 11/13/12 | Low-flow  | 616                     | 352    | 911    | 0      | 36                        | 24    |
| 13286        | Milwaukee | 11/13/12 | Event     | 1208                    | 448    | 661    | 0      | 9                         | 12    |
| 13287        | Menominee | 11/15/12 | Event     | 225                     | 0      | 225    | 0      | 0                         | 2     |
| 13288        | Manitowoc | 11/15/12 | Event     | 225                     | 0      | 1977   | 4293   | 13                        | 5     |
| 13289        | Menominee | 11/26/12 | Low-flow  | 426                     | 225    | 678    | 0      | 3                         | 4     |
| 13291        | Manitowoc | 11/26/12 | Low-flow  | 225                     | 0      | 1057   | 0      | 8                         | 6     |
| 13295        | Milwaukee | 11/26/12 | Low-flow  | 1101                    | 485    | 3242   | 0      | 8                         | 11    |
| 13328        | Maumee    | 12/6/12  | Low-flow  | 0                       | 0      | 0      | 0      | 7                         | 5     |
| 13329        | Portage   | 12/6/12  | Low-flow  | 18607                   | 3025   | 3411   | 0      | 50                        | 34    |

| FT                         | Site      | DATE     | Hydrology | qPCR Assays (CN/100 mL) |        |       |        | Plate-counts (CFU/100 mL) |       |
|----------------------------|-----------|----------|-----------|-------------------------|--------|-------|--------|---------------------------|-------|
|                            |           |          |           | HB                      | LAC    | ENT   | RUM    | Entero                    | Ecoli |
| 13332                      | Clinton   | 12/17/12 | Event     | 47113                   | 16353  | 5082  | 585    | 490                       | 166   |
| 13472                      | Raisin    | 1/9/13   | Low-flow  | 2728                    | 1048   | 310   | 330    | 6                         | 10    |
| 13473                      | Clinton   | 1/9/13   | Low-flow  | 35986                   | 14889  | 2797  | 0      | 63                        | 166   |
| 13474                      | Menominee | 1/9/13   | Low-flow  | 484                     | 225    | 0     | 0      | 0                         | 0     |
| 13475                      | Milwaukee | 1/9/13   | Low-flow  | 422                     | 246    | 1115  | 0      | 78                        | 0     |
| 13488                      | Clinton   | 1/15/13  | Event     | 8522                    | 9927   | 10595 | 19565  | 1030                      | 320   |
| 13489                      | Milwaukee | 1/14/13  | Event     | 1642                    | 1889   | 1870  | 525    | 86                        | 42    |
| 13491                      | Manitowoc | 1/13/13  | Event     | 1146                    | 2042   | 23015 | 183143 | 490                       | 220   |
| 13492                      | Rouge     | 1/15/13  | Event     | 1195                    | 4861   | 4913  | 0      | 180                       | 118   |
| 13493                      | Menominee | 1/16/13  | Event     | 1137                    | 330    | 0     | 555    | 14                        | 0     |
| 13510                      | Manitowoc | 2/1/13   | Event     | 1692                    | 4284   | 43414 | 892006 | 3100                      | 1040  |
| 13511                      | Milwaukee | 2/1/13   | Event     | 17150                   | 17619  | 15177 | 4086   | 1850                      | 420   |
| 13512                      | Clinton   | 2/1/13   | Event     | 221794                  | 181862 | 15814 | 9449   | 910                       | 340   |
| 13513                      | Raisin    | 2/1/13   | Event     | 6001                    | 3851   | 6562  | 27743  | 730                       | 136   |
| 13514                      | Rouge     | 2/1/13   | Event     | 30453                   | 61651  | 12581 | 0      | 870                       | 730   |
| 13515                      | Portage   | 2/1/13   | Event     | 36812                   | 41222  | 17177 | 10797  | 1620                      | 490   |
| 13516                      | Maumee    | 2/1/13   | Event     | 7606                    | 6277   | 2396  | 9522   | 510                       | 171   |
| 13547                      | Manitowoc | 2/18/13  | Low-flow  | 438                     | 113    | 262   | 1172   | 0                         | 5     |
| 13549                      | Portage   | 2/26/13  | Low-flow  | 27311                   | 17523  | 6199  | 0      | 20                        | 24    |
| 13550                      | Maumee    | 2/26/13  | Low-flow  | 3165                    | 1256   | 360   | 0      | 15                        | 0     |
| 13551                      | Raisin    | 2/25/13  | Low-flow  | 16807                   | 5380   | 895   | 360    | 13                        | 39    |
| 13552                      | Rouge     | 2/25/13  | Low-flow  | 8900                    | 4252   | 2962  | 0      | 28                        | 29    |
| 13553                      | Clinton   | 2/25/13  | Low-flow  | 11364                   | 8294   | 3775  | 0      | 31                        | 33    |
| 13567                      | Rouge     | 3/6/13   | Low-flow  | 30814                   | 9628   | 4842  | 0      | 69                        | 78    |
| 13665                      | Rouge     | 3/13/13  | Event     | 4826                    | 4648   | 3359  | 0      | 182                       | 151   |
| 13666                      | Clinton   | 3/14/13  | Event     | 2025                    | 2348   | 5555  | 12522  | 108                       | 36    |
| 13667                      | Portage   | 3/13/13  | Event     | 55286                   | 26374  | 7422  | 4665   | 185                       | 279   |
| 13668                      | Maumee    | 3/13/13  | Event     | 8377                    | 7781   | 4364  | 9339   | 114                       | 69    |
| 13671                      | Manitowoc | 3/14/13  | Event     | 225                     | 875    | 14795 | 268184 | 580                       | 77    |
| 13678                      | Milwaukee | 3/21/13  | Low-flow  | 2485                    | 1180   | 1628  | 27435  | 34                        | 16    |
| 13679                      | Manitowoc | 3/27/13  | Low-flow  | 225                     | 225    | 695   | 16486  | 17                        | 4     |
| 13680                      | Menominee | 3/27/13  | Low-flow  | 3553                    | 1071   | 327   | 0      | 0                         | 0     |
| 13683                      | Milwaukee | 4/1/13   | Event     | 301                     | 503    | 4697  | 14620  | 41                        | 2     |
| 13684                      | Rouge     | 4/3/13   | Low-flow  | 5208                    | 936    | 909   | 0      | 17                        | 19    |
| 13685                      | Clinton   | 4/3/13   | Low-flow  | 11976                   | 3370   | 1079  | 0      | 103                       | 34    |
| 13686                      | Maumee    | 4/4/13   | Low-flow  | 4764                    | 1349   | 1607  | 3787   | 5                         | 4     |
| 13687                      | Portage   | 4/4/13   | Low-flow  | 12753                   | 2305   | 2561  | 0      | 23                        | 0     |
| 13689                      | Raisin    | 4/4/13   | Low-flow  | 1552                    | 406    | 527   | 0      | 4                         | 9     |
| 13819                      | Maumee    | 4/16/13  | Event     | 15113                   | 17063  | 14833 | 17901  | 600                       | 900   |
| 13821                      | Portage   | 4/16/13  | Event     | 82880                   | 79761  | 40213 | 44174  | 9400                      | 4600  |
| 13827                      | Manitowoc | 4/17/13  | Event     | 225                     | 225    | 4662  | 54060  | 200                       | 36    |
| 13828                      | Menominee | 4/17/13  | Event     | 0                       | 0      | 0     | 0      | 4                         | 0     |
| 13856                      | Rouge     | 4/14/13  | Event     | 30911                   | 50894  | 17473 | 1275   | 820                       | 710   |
| 13858                      | Clinton   | 4/12/13  | Event     | 27212                   | 55295  | 6344  | 3401   | 240                       | 60    |
| 14008                      | Clinton   | 4/24/13  | Event     | 65740                   | 100878 | 6471  | 4900   | 260                       | 150   |
| 14009                      | Rouge     | 4/24/13  | Event     | 16593                   | 55184  | 5953  | 450    | 540                       | 520   |
| 14049                      | Menominee | 5/6/13   | Event     | 504                     | 549    | 222   | 0      | 0                         | 4     |
| 14050                      | Manitowoc | 5/8/13   | Low-flow  | 225                     | 359    | 2543  | 0      | 3                         | 39    |
| 14057                      | Milwaukee | 5/17/13  | Low-flow  | 747                     | 425    | 425   | 0      | 3                         | 11    |
| 14170                      | Menominee | 5/28/13  | Event     | 0                       | 0      | 0     | 0      | 0                         | 5     |
| 14197                      | Clinton   | 5/30/13  | Event     | 225                     | 246    | 979   | 0      | 132                       | 204   |
| 14237                      | Maumee    | 6/5/13   | Event     | 508                     | 346    | 3777  | 0      | 330                       | 1450  |
| 14238                      | Clinton   | 6/3/13   | Event     | 0                       | 225    | 29494 | 0      | 84                        | 640   |
| 14239                      | Raisin    | 6/4/13   | Event     | 0                       | 225    | 3378  | 0      | 98                        | 61    |
| 14248                      | Rouge     | 6/6/13   | Low-flow  | 2810                    | 1047   | 2919  | 0      | 370                       | 280   |
| 14369                      | Maumee    | 6/17/13  | Event     | 797                     | 328    | 22610 | 345    | 660                       | 420   |
| 14391                      | Rouge     | 6/16/13  | Event     | 4272                    | 24156  | 15797 | 555    | 1890                      | 3380  |
| 14392                      | Clinton   | 6/16/13  | Event     | 14432                   | 42046  | 16948 | 0      | 800                       | 1620  |
| 14393                      | Raisin    | 6/16/13  | Event     | 396                     | 428    | 3877  | 1153   | 1050                      | 810   |
| 14474                      | Maumee    | 6/27/13  | Event     | 225                     | 0      | 4911  | 0      | 66                        | 71    |
| 14491                      | Portage   | 7/1/13   | Event     | 2971                    | 1657   | 4451  | 615    | 980                       | 680   |
| 12961; 12967               | Menominee | 9/26/12  | Event     | 225                     | 18     | 497   | 0      | 0                         | 3     |
| 13148; 13203               | Manitowoc | 10/15/12 | Event     | 68                      | 299    | 17055 | 78465  | 428                       | 235   |
| 13481; 13494               | Portage   | 1/14/13  | Event     | 31992                   | 35571  | 42796 | 12650  | 5380                      | 673   |
| 13482; 13495               | Maumee    | 1/14/13  | Event     | 5415                    | 11261  | 25662 | 16736  | 2518                      | 276   |
| 13490; 13496               | Raisin    | 1/14/13  | Event     | 600                     | 818    | 647   | 539    | 17                        | 6     |
| 13688; 13779; 13829; 14011 | Milwaukee | 4/5/13   | Event     | 154910                  | 132279 | 26762 | 83513  | 1264                      | 1585  |
| 13855; 14007               | Raisin    | 4/15/13  | Event     | 5166                    | 5120   | 5016  | 27871  | 617                       | 218   |
| 14010; 14017               | Menominee | 4/24/13  | Event     | 103                     | 236    | 212   | 466    | 2                         | 0     |

**Table S5.** Spearman’s rank correlation coefficients (rho) for HB or Lachno2 and ENT for all sites and at each site. Event and low-flow correlations are presented. p, significance level of correlation coefficients.

| Site      | HB and ENT |        |          |        | Lachno2 and ENT |        |          |        |
|-----------|------------|--------|----------|--------|-----------------|--------|----------|--------|
|           | Event      |        | Low-flow |        | Event           |        | Low-flow |        |
|           | rho        | p      | rho      | p      | rho             | p      | rho      | p      |
| All Sites | 0.71       | <0.001 | 0.45     | <0.001 | 0.74            | <0.001 | 0.43     | <0.001 |
| Rouge     | 0.80       | <0.001 | 0.52     | 0.08   | 0.92            | <0.001 | 0.59     | 0.05   |
| Clinton   | 0.32       | 0.15   | 0.37     | 0.24   | 0.36            | 0.11   | 0.34     | 0.29   |
| Milwaukee | 0.63       | 0.03   | 0.62     | 0.04   | 0.74            | 0.005  | 0.48     | 0.14   |
| Raisin    | 0.38       | 0.22   | -0.09    | 0.78   | 0.45            | 0.14   | -0.23    | 0.48   |
| Maumee    | 0.77       | <0.001 | 0.55     | 0.06   | 0.68            | 0.001  | 0.49     | 0.10   |
| Portage   | 0.78       | <0.001 | 0.15     | 0.68   | 0.85            | <0.001 | 0.64     | 0.05   |
| Manitowoc | 0.54       | 0.02   | -0.54    | 0.10   | 0.76            | <0.001 | -0.53    | 0.12   |
| Menomonee | 0.15       | 0.61   | -0.18    | 0.63   | 0.13            | 0.66   | -0.13    | 0.72   |

**Table S6.** Percent enterococci and *E. coli* over Federal water quality thresholds found at each site. FIB measured in colony forming unit (CFU)/100 mL.

| Site                    | Enterococci | <i>E. coli</i> |
|-------------------------|-------------|----------------|
| <b>Rouge (n=30)</b>     |             |                |
| Event                   | 100%        | 83%            |
| Low                     | 67%         | 25%            |
| <b>Clinton (n=33)</b>   |             |                |
| Event                   | 100%        | 75%            |
| Low                     | 33%         | 33%            |
| <b>Milwaukee (n=24)</b> |             |                |
| Event                   | 23%         | 23%            |
| Low                     | 9%          | 0%             |
| <b>Raisin (n=24)</b>    |             |                |
| Event                   | 73%         | 18%            |
| Low                     | 25%         | 0%             |
| <b>Maumee (n=30)</b>    |             |                |
| Event                   | 61%         | 44%            |
| Low                     | 33%         | 17%            |
| <b>Portage (n=27)</b>   |             |                |
| Event                   | 94%         | 94%            |
| Low                     | 30%         | 30%            |
| <b>Manitowoc (n=27)</b> |             |                |
| Event                   | 53%         | 24%            |
| Low                     | 10%         | 0%             |
| <b>Menominee (n=24)</b> |             |                |
| Event                   | 0%          | 0%             |
| Low                     | 0%          | 0%             |



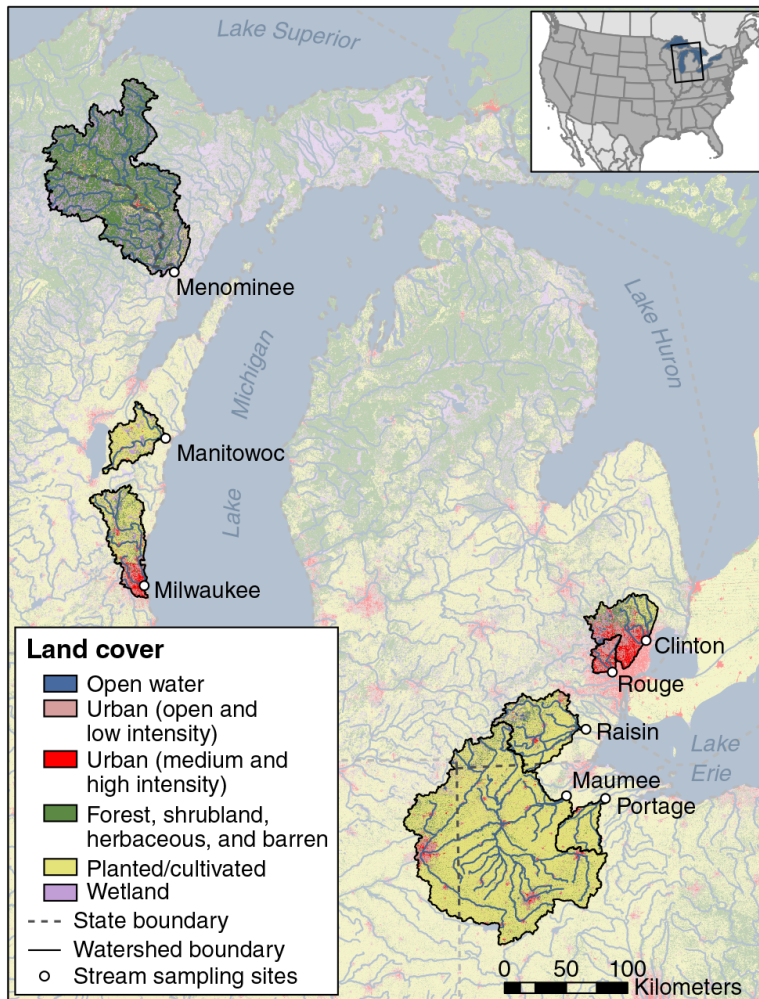

**Figure S1.** Map of eight Great Lakes watersheds studied for microbiological contamination. Major land use categories and watershed boundaries (U.S. Department of Agriculture-Natural Resources Conservation Service (2009)). Collection sites (white dots) located at USGS streamgages nearest receiving waters.

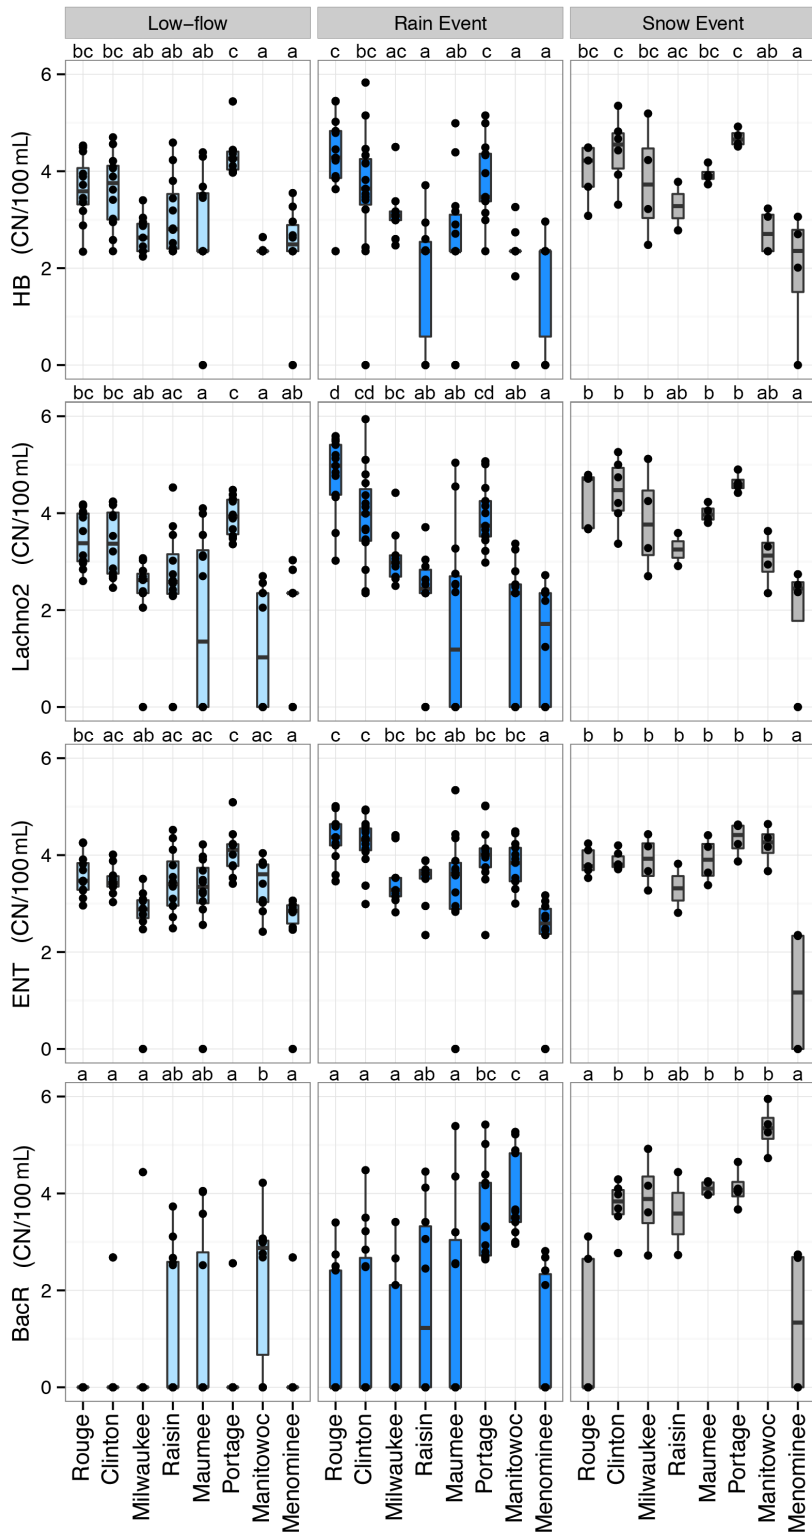

**Figure S2.** Boxplots showing low-flow (light-blue), rain (dark-blue) and snowmelt (gray) event concentrations of fecal indicators. Letters above plots indicate significant differences between watersheds in mean indicator concentrations (Tukey). Individual letters indicate differences of a single group, and multiple letters indicate aggregated groupings of significant differences. Y-axis is log-base10. The center line of each boxplot represents the median, the upper line represents the 75th percentile, the lower line represents the 25th percentile, the upper whisker represents the maximum, the lower whisker represents the minimum, and the dots represent sample distribution. HB = human *Bacteroides*; Lachno2 = human *Lachnospiraceae2*; ENT = enterococcus; BacR = ruminant *Bacteroides*.
